23 **Abstract**

24 **Background:** Long term outcomes of allograft recipients are compromised by the development of  
25 chronic lung allograft dysfunction (CLAD) promoting bronchiolitis obliterans syndrome (BOS). We  
26 established baseline transcriptomic profiles of both the large and small airway epithelial cells (referred  
27 as LAEC and SAEC, respectively) to identify regional differences irrespective of initiating disease.

28 **Methods:** We obtained matched primary LAEC and SAEC from lung allograft recipients ( $n=4$ ,  $42.5 \pm$   
29  $4.2$  years) and established primary cultures. Bulk RNA sequencing was performed to determine  
30 differentially expressed genes.

31 **Results:** We observed differences in the transcriptional program between LAEC and SAEC  
32 Transcription factors (TF) were ranked within the top ten differentially regulated genes. The most  
33 abundant TF families included C2H2-ZF, homeobox and bHLH. Upstream regulator analyses  
34 identified homeobox genes being significantly in LAEC. Protein-protein interaction network analysis  
35 emphasised the role of TFs (*ISL1*, *MSX1*, *HOXA1*, *GATA6*, *ZNF423*) in airway modulation.  
36 Additionally, functional enrichment analysis revealed the activation of chemotaxis,  
37 metalloendopeptidase/metallopeptidase activity and pro-inflammatory signatures (IL17 signalling and  
38 RAGE), in LAEC, while SAEC were characterised by elevated expression of surfactant metabolism  
39 related genes. Moreover, alveolar and club cells-related genes were expressed in SAEC, suggesting a  
40 lower airway-specific signature.

41 **Conclusion:** Our analysis shows robust transcriptional differences between LAEC and SAEC. We  
42 suggest a potential role for homeobox TF family as well as the activation of the immune system in the  
43 biology of LAEC. Conversely, we observed an alveoli-like transcriptional signature in SAEC,  
44 including gas-exchange signals and surfactant metabolism; pathways involved in lung homeostasis.

45

46

## 47 **Introduction**

48 Chronic allograft dysfunction (CLAD) due to bronchiolitis obliterans syndrome (BOS) is a major  
49 complication following pulmonary transplantation whose aetiology is not fully understood<sup>1</sup>. Recent  
50 findings indicate that the pathology of CLAD is not only limited to the small airways, but also manifests  
51 in the proximal airways<sup>2</sup>. The underlying mechanism of BOS is suggested to involve injury and  
52 inflammation of epithelial and subepithelial cells, which in turn stimulates wound repair and epithelial  
53 to mesenchymal transition signaling<sup>3</sup>. Thus, understanding the pathological mechanisms contributing  
54 to the onset of BOS, could facilitate tailored interventions aimed at preventing this pathology.

55 For the purpose of tracking the different processes that might lead to the onset of BOS, we conducted  
56 a baseline study, to compare matched samples of proximal and distal lung airways, without any sign  
57 of disease. We did RNA-seq to explore regional transcriptional differences in epithelial cultures  
58 established from large/proximal and small/distal airway epithelial cells (referred as LAEC and SAEC)  
59 from Lung Transplant recipients. Here, we observed that distal airways culture expressed genes related  
60 to surfactant metabolism. Whereas proximal airways cultures displaying two proinflammatory  
61 pathways and fibrosis pathways that might be related to early dysregulation of BOS; providing  
62 evidence that alterations in gene expression begin in the proximal airways.

## 63 **Materials and Methods**

### 64 **Patient and sampling procedures**

65 Matched samples from proximal and distal lung biopsies were obtained from lung allograft recipients  
66 during the routine surveillance bronchoscopy (Figure S1A). Patients did not present symptomatology  
67 indicative of bronchiolitis obliterans syndrome (BOS), transplant rejection or infections at the time of  
68 sample collection. Specimens were obtained from four patients (3 females, age range 38-47) that  
69 underwent double lung transplantation as previously described<sup>4</sup>. The reasons for lung transplantation

70 were cystic fibrosis (3 cases), and congenital heart disease (1 case). Both, LAEC and SAEC were  
71 grown as a monolayer to confluency and cells then harvested for transcriptomics analysis (Figure S1B).  
72 The study was approved by the Royal Perth Hospital, Ethics Committee (Registration: EC2006/021)  
73 and written consent was obtained from each participant after being fully informed about the premise  
74 and purpose of the study. A summary that outlines the analyses performed here is presented in Figure  
75 S2.

## 76 **Total RNA extraction, library preparation and sequencing**

77 Total RNA was extracted using the PureLink® RNA kit (Life Technologies) following their  
78 instructions and treated with RNase Inhibitor (Applied Biosystems™) and DNase I (Invitrogen™).  
79 RNA concentration and integrity were then determined using a NanoDrop system and an Agilent  
80 Bioanalyser, respectively. Libraries were generated using TruSeq Stranded mRNA (Illumina) kit and  
81 Poly(A) enrichment. Sequencing was performed using 100 bp single-end configuration (SE; 100 bp;  
82 20 M).

## 83 **Bioinformatic and statistical analyses**

84 FASTQ files were quality controlled using FastQC  
85 (<https://www.bioinformatics.babraham.ac.uk/projects/fastqc/>). Reads were trimmed and adapters  
86 removed with Trimmomatic<sup>5</sup> (Figure S3A and S3B). High-quality reads were then mapped to human  
87 reference genome (hg19/GRCh37, Ensembl) using Spliced Transcripts Alignment to a Reference  
88 (STAR)<sup>6</sup>. Gene-level quantification of raw counts was performed using High-Throughput Sequencing<sup>7</sup>  
89 (HTSeq; Supplementary Materials S1) and post-alignment stats were generated with MultiQC<sup>8</sup> (Figure  
90 S3C and S3D). Gene expression analysis was done using EdgeR<sup>9</sup> and limma<sup>10</sup>. Latent variance was  
91 treated with removeBatchEffect function from limma<sup>10</sup>. Expression values were used for cluster  
92 analysis using pvclust R package<sup>11</sup> (Figure S4; Supplementary Materials S2). *P*-values were corrected  
93 for multiple-testing using the Benjamini-Hochberg's method, False Discovery Rate (FDR)<sup>12</sup>. Ranking

94 metric for top regulated genes was calculated as follow: [Rank = -sign(log<sub>2</sub>FC) \* log<sub>10</sub>(FDR)].  
95 Differentially expressed genes (DEGs) were then filtered considering an FDR ≤0.05 and a Fold-Change  
96 (FC) ≥|1.5| and annotation was added using the org.Hs.eg.db R package<sup>13</sup> (Supplementary Materials  
97 S3). Volcano plot was generated using EnhancedVolcano R package<sup>14</sup>.  
98 Mining of transcription Factors (TF) in our data was done following the pipeline described by Lambert  
99 *et al.*,<sup>15</sup> (Supplementary Materials S4) Analysis of upstream transcriptional regulators was performed  
100 with ChEA3<sup>16</sup> (Supplementary Materials S5). Protein-protein interaction networks were generated  
101 using NetworkAnalyst<sup>17</sup> and subsequently analysed using NetworkAnalyzer App with  
102 NetworkAnalyzer App (Supplementary Materials S6). Enrichment analyses of gene ontology (GO),  
103 KEGG and Reactome databases were done using ClusterProfiler<sup>18</sup> (Supplementary Materials S7). The  
104 RNA-sequencing data have been deposited in the National Center for Biotechnology Information's  
105 Bioproject PRJNA885405 and Gene Expression Omnibus (GEO) under accession number GSE214434  
106 (<https://www.ncbi.nlm.nih.gov/geo/query/acc.cgi?acc=GSE214434>).

## 107 **Results**

108 To determine any regional transcriptional differences between the lung airways, LAEC were compared  
109 to SAEC. Hereafter, up-regulated genes will be referred as active in LAEC and down-regulated genes  
110 as active in SAEC.

### 111 **Gene expression differences between lung regional comparison.**

112 After filtering, a total of 355 differentially expressed genes (DEGs), 188 up-regulated and 167 down-  
113 regulated genes were identified (Figure 1A). A volcano plot shows the bidirectional distribution  
114 patterns of up- and down-regulated genes along with the top genes (Figure 1B). Among the top 10  
115 ranked genes, two transcription factors (TFs) (*ZFHX4* and *MSX1*) belonging to homeobox family were  
116 found to be up-regulated, and *ZNF730* belonging to C2H2 Zinc Finger (ZF) which was down-regulated.

## 117 **Transcript Factors modulation underlies gene expression differences between lung airways**

118 Knowing the essential role TF have in gene modulation, we explored their potential contribution  
119 towards the differences seen between the LAEC and SAEC gene transcriptional profiles. For this  
120 purpose we made use of the human TFs catalogue<sup>15</sup>. We detected a total of 26 TF belonging to eight  
121 TF families and the three most abundant including C2H2 ZF (34.6 %), homeobox (26.9 %) and bHLH  
122 (11.5 %) families (Figure 2A; Supplementary Materials S4). Using Venn diagram analysis, two  
123 overlapping families were identified from up- and down-regulated genes comparison (C2H2 ZF and  
124 homeobox) (Figure 2B). More interesting, four TFs families were uniquely identified in LAEC (BED  
125 ZF, DM, Fox and T-box), and two specific in SAEC (bHLH and GATA) (Figure 2B). Bar plots  
126 summarise the 14 up- and 12 down-regulated TFs (Figure 2C).

## 127 **Homeobox genes represent central modulators of gene expression in the proximal airways**

128 To gain insight into the gene regulatory network of the airways and identify upstream modulators  
129 linked to the observed DEGs, we performed a TF enrichment analysis (TFA). We retrieved 161  
130 upstream regulators significantly associated with the up-regulated genes, of which eight TF belonging  
131 to homeobox family were observed in the top ten upstream regulators (Figure 3A). In contrast, no  
132 upstream regulators for the down-regulated genes were identified. To better understand the interaction  
133 between TFs and modulated genes, we then generated networks based on the relevant associations  
134 (Figure 3B; Supplementary Materials S5). Interaction between six upstream regulators explained the  
135 activation of 18 genes. *HOXD10* and *HOXD9* represented central modules explaining differences in  
136 gene expression of five genes, three of which are TF (*MSX1*, *TBX3* and *FOXD1*) (Figure 3B). Lastly,  
137 topological analyses were used to identify hub genes from the DEGs. This network analysis employed  
138 823 nodes with at least one connected component, where 97 annotated genes belong to our DEG core.  
139 Hub genes were extracted by filtering nodes above 14 degrees, which resulted in a set of 24 genes (17  
140 up-regulated and 7 down-regulated genes) (Figure 3C) and the top five hubs are *SPP1*, *HOXA1*,

141 *SI00A8*, *KRT14* and *ID2*. Besides, several TFs were identified as hub genes, three up-regulated (*ISL1*;  
142 *MSX1*; *HOXA1*) and two down-regulated (*GATA6*; *ZNF423*). Again, the three hub TFs from up-  
143 regulated genes belong to homeobox family.

#### 144 **Functional enrichment shows a pro-inflammatory signature in proximal airway and pulmonary** 145 **surfactant metabolism in the distal airway**

146 We next performed functional enrichment to determine the biological pathways associated with the up-  
147 and down-regulated genes. Specifically, we utilised pathway over-representation analysis using GO,  
148 Reactome and KEGG databases followed by a category-gene network (Figure 4A-B, Supplementary  
149 Materials S7). Several categories were identified enriched from the up- and down-regulated gene list.  
150 The top two more statistically significant pathways were taxis/chemotaxis and activity of  
151 metalloendopeptidase/metallopeptidase. Besides two pro-inflammatory pathways (RAGE receptor  
152 binding and IL17 signalling pathways) were also enriched. Conversely, two pathways representing the  
153 down-regulated genes were observed: benzaldehyde dehydrogenase activity and surfactant  
154 metabolism.

#### 155 **Discussion**

156 The study of the transcriptional lung regional differences in lung allograft recipients provides an  
157 excellent tool to understand baseline molecular mechanisms/signatures that may drive chronic allograft  
158 rejection. With this objective in mind, we analysed transcriptional differences between LAEC and  
159 SAEC from lung allograft recipients. Our results support the hypothesis that airway transcriptional  
160 regional differences exist, where TF genes, specifically homeobox TF may have a potential role in  
161 establishing these differences. Protein-protein interaction network analysis emphasised the role of  
162 *ISL1*, *MSX1*, *HOXA1* in LAEC, and *GATA6*, *ZNF423* in SAEC. Furthermore, functional enrichment  
163 analysis identified activation of chemotaxis, metalloendopeptidase/metallopeptidase and two pro-  
164 inflammatory categories in DEGs from LAEC and surfactant metabolism in SAEC DEGs.

165 Several TF (~7%) were noticed in the top ten genes of the DEG (Figure 1). Detailed analysis about TF  
166 families' composition in the airways found homeobox and C2H2 ZF in common (Figure 2). Homeobox  
167 is related with patterning in lung branching<sup>19</sup>, and although C2H2 ZF plays important roles in  
168 development and disease, still remain poorly characterized<sup>20</sup>. Four unique TF families were up-  
169 regulated, including BED-ZF, DM, FOX, and T-box, which are involved in development, among other  
170 functions. Several TF identified in these families serve primary roles in the lung. For instance, *ZBED2*  
171 has been predicted to promote the keratinocyte basal state, inducing differentiation<sup>21</sup>. In addition,  
172 *DMRT2* is involved in establishing left–right asymmetry and somitogenesis; whereas *DMRTA2*, also  
173 known as *DMRT5*, has been reported in anterior neural tissue development<sup>22</sup>. Moreover, *FOXD1* has  
174 been linked as a marker for lung pericytes and *FOXC2* in vascularisation<sup>23</sup>. Finally, *TBX3* has been  
175 found to be involved in lung branching morphogenesis with expression in the lung mesenchyme<sup>24</sup>. In  
176 contrast, two specific TF families, bHLH and GATA, were identified in the down-regulated genes. The  
177 bHLH family is important in regulating embryonic development, and *NPASI* has been reported to  
178 regulate branching morphogenesis in the embryogenic lung<sup>25</sup>. Furthermore, the GATA family plays an  
179 important role in both epithelial and smooth muscle cell lineage diversity in the lung. Specifically,  
180 *GATA6* has been found to induce differentiation of primitive foregut endoderm into respiratory  
181 epithelial cell lineages, in addition to regulating surfactant protein genes<sup>19</sup>.

182 Next, upstream regulator enrichment analysis of the up-regulated genes predicted that *HOXD9* and  
183 *HOXD10* homeobox genes activate *MSX1*, *TBX3* and *FOXD1* (Figure 3B). Interestingly, *MSX1* and  
184 *TBX3* are expressed in mesenchyme cells in the single cell (sc) lung map website<sup>26</sup> (LungGENS, 10X  
185 sc 24-years-old), and have been shown to be regulated by Hedgehog and Wnt signalling pathways<sup>24,27</sup>.  
186 Network analyses identified 24 hub genes (Figure 3C); from the up-regulated hubs we found a  
187 conserved signature (*CSF1R*; *MMP1*; *CD8A*; *PLAT*; *SI00A8*; *SPPI*) similar to that of the tracheal /  
188 proximal airway<sup>28</sup>, with genes involved in a variety of processes including cell migration, inflammation



189 response and chemokine production. Moreover, the three TF detected in the up-regulated gene hubs  
190 are related to morphogenesis; two specific to mesenchyme development and the other to proximal  
191 airways development<sup>27,29</sup>.

192 Interestingly, several pathways were statically significant in a functional enrichment analysis (Figure  
193 4). From the up-regulated gene list, taxis/chemotaxis processes had the most statistical significant  
194 values. Chemotaxis, defined as the directed migration of cells towards a specified entity, are important  
195 for cellular patterning and development<sup>30</sup>. In drosophila, chemotaxis has been detected in the tracheal  
196 epithelium<sup>31</sup>. Likewise, the metalloendopeptidase activity pathway was also observed to be activated  
197 through two matrix metalloproteinase (MMP) genes (*MMP1*, *MMP13*). In skin repair, *MMP1* alters  
198 the migratory substratum driving the forward movement of the repairing cells by allowing them to  
199 attach, dislodge, then reattach to the wounded matrix<sup>32</sup>. Interestingly, *MM13* has been shown to play a  
200 role in the pathogenesis of liver and lung fibrosis<sup>33-35</sup>. Additionally, two proinflammatory (IL17  
201 signalling and RAGE receptor binding) plus an antimicrobial pathway were enriched in the up-  
202 regulated genes. Amongst these genes, *S100A7* and *S100A8* are known to expressed in the trachea<sup>36</sup>  
203 and have been reported to have a role in innate immune responses to pathogens<sup>37</sup>. Both have gained  
204 research interest because they exhibit selectivity towards pathogenic bacteria, while having no effect  
205 on beneficial commensal bacteria<sup>38,39</sup>.

206 Interestingly, the up-regulated enriched categories are also related to epithelial repair and innate  
207 immunity and may suggest that their activation after lung transplantation may help prevent the entry  
208 of undesirable microorganisms via the production of chemokines and antimicrobial peptides<sup>32</sup>. The  
209 inflammation category activation also supports this hypothesis, since it can act as a defence mechanism  
210 to abiotic<sup>40</sup> and biotic<sup>41</sup> insults. However, a fibrosis-related gene was also observed within the LAEC  
211 signature, which in the long term could function to compromise lung allograft outcomes<sup>33-35</sup>.

212 Two hub upstream regulators from the up-regulated genes, *HOXD9* and *HOXD10*, are known to  
213 activate TF involved with the chemotaxis process (*FOXD1*; *ISL1*) (Fig 3B and 4B) and genes related  
214 to mesenchymal cells (*ISL1*; *MSX1*; *TBX3*). In adults, directional movement of chemotaxis modulates  
215 different responses depending on whether it is infectious or injurious. In the first, immune cells would  
216 be activated and, in the latter, wound healing and tissue regeneration responses are activated. The latter  
217 is provided by the regional stem cells that move into damaged areas, produce connective tissue and  
218 maintain tissue homeostasis<sup>30</sup>. It is unclear whether this proximal airway signature from LTx patients  
219 could be due as part of healing/regeneration response after the lung transplantation, or as part of the  
220 immune response linked with the proinflammatory processes previously reported<sup>30,42</sup>. Conversely, only  
221 two pathways were enriched from the down-regulated gene list. The first, surfactant metabolism, is  
222 essential in small airways because it regulated alveolar surface tension and plays a role in protection  
223 against oxidants and infection<sup>43</sup>. The second, NAD- and NADP-dependent benzaldehyde  
224 dehydrogenase (ALDH) are involved in detoxification and prior work has reported *ALDH1* and  
225 *ALDH3A1* to be involved in the host defence response to toxins in smokers<sup>44</sup>.

226 We acknowledge a number of limitations to this research. Firstly, due to the precious nature of the  
227 samples involved, this pilot study has a limited number of biological replicates from LTx recipients.  
228 Despite this, there was sufficient sensitivity to obtain DEG using the rigorous analysis pipeline  
229 outlined. Also, the limited expansion potential of primary AEC is a limitation<sup>45</sup> and its effects remain  
230 unknown at the transcriptomic level. Nevertheless, we believe that the utilisation of ‘unaltered primary  
231 airway cells’ are a significant strength of this study. Likewise, monolayer cultures may oversimplify  
232 the multicellular interactions, but a robust and repeatable model with low methodological variation is  
233 important. All together, we are confident that limitations are minor and that our results provide new  
234 insight into the transcriptional regional differences. For prospective studies, these limitations could be  
235 solved with the use cell culture of specialized cells.

236 In conclusion, the data presented here suggests distinctive signatures from LAECs and SAECs at a  
237 transcriptomic level, establishing new insights into regional gene expression in the airways of lung  
238 transplant recipients (Figure 4C). Proximal airway gene expression changes included a  
239 proinflammatory signature which may indicate a defence mechanism since it is the first barrier of  
240 defence, as well as a fibrotic signature which may initiate downstream complications such as BOS  
241 establishment. In contrast, the small airways reflect a characteristic alveoli's hallmark, including gas-  
242 exchange signals and secretion of pulmonary surfactant proteins. These results will seed future large  
243 scale works to determine the predictive value of these genes as potential biomarkers aimed at  
244 maintaining baseline lung health of allograft recipients.

#### 245 **Data Availability Statement**

246 Raw datasets have been uploaded to GEO, with accession number GSE214434.

#### 247 **Ethics Statement**

248 The study was approved by the Royal Perth Hospital, Ethics Committee (Registration: EC2006/021)  
249 and written consent was obtained from each participant after being fully informed about the premise  
250 and purpose of the study.

#### 251 **Author Contributions**

252 Conceptualization: SMS, AK and PAR. Data curation: PAR. Formal analysis: PAR. Funding  
253 acquisition: SMS and AK. Investigation: PAR, KML, MAL, JPW, MM, SMS and AK. Methodology:  
254 PAR, KML, MAL, JPW, MM, SMS and AK. Resources: PAR. Visualization: PAR. Manuscript  
255 writing: PAR and AK. Manuscript review: PAR, KML, MAL, JPW, MM, SMS and AK.

#### 256 **Conflict of Interest**

257 The authors declare that the research was conducted in the absence of any commercial or financial  
258 relationships that could be construed as a potential conflict of interest.

#### 259 **Acknowledgments**

260 This work was supported by grants from the McCusker Foundation and the Heart and Lung Transplant  
261 Foundation of Western Australia. A.K. is a Rothwell Family Fellow. S.M.S. is an NHMRC Practitioner  
262 Fellow. Analysis was performed in the Pawsey Supercomputing Research Centre with funding from  
263 the Australian Government and the Government of Western Australia.

## 264 **Figure legend**

265 **Figure 1. Transcriptomic signatures between proximal and distal lung regions.** (A) Bar plot  
266 summarises the number of DEGs ( $FC \geq |1.5|$  and  $FDR < 0,05$ ) of the regional comparison on the y-  
267 axis and direction of the change on the x-axis, divided in up- and down-regulated genes, up (red) and  
268 down (blue), respectively. (B) Volcano plot displays bidirectional  $\log_2 FC$  on the x-axis and absolute  
269  $\log_{10} FDR$  on the y-axis. Top 10 ranked genes for up- and down-regulated genes are labelled in each  
270 case and bold letter highlight Transcription Factor (TF) genes.

271 **Figure 2. Identification of Transcription Factors (TF) regulating proximal and distal lung**  
272 **regions.** (A) Pie plot represents the percentage of TF families from the TF in DEGs. (B) Venn diagram  
273 highlights the common and uniquely TF families between LEAC and SAEC. Blue and pink represent  
274 proximal/LAEC and distal/SAEC samples. (C) Bar plots depict the TF signature found between up-  
275 and down-regulated as LAEC and SAEC, respectively. Colour palette refers to the TF families.

276 **Figure 3. Upstream regulator enrichment and transcriptional network analyses of significantly**  
277 **differentially expressed genes.** (A) Bar plot visualisation of TF enrichment analysis (TFEA) shows  
278 the top upstream regulators enriched from the DEGs core using a Fisher's exact test (FET) from ChIP-  
279 X Enrichment Analysis 3 (ChEA3)<sup>16</sup>. Up- and down-regulated genes are represented in red and blue,  
280 respectively. Dash line represents the FDR 5% limit. (B) Network analysis of upstream regulators and  
281 associated regulated genes from up-regulated genes. Network was clustered using an Edge-weighted  
282 Spring-Embedded Layout method<sup>46</sup>. Brighter colours illustrate upstream regulators. Shapes depict  
283 genes and TF as circles and diamonds, respectively. (C) Protein-protein interaction network of the  
284 differentially expressed genes (DEG) was calculated from IMEx Interactome database of InnateDB  
285 (<https://www.innatedb.com>) using NetworkAnalyst<sup>17</sup>, it was analysed and visualised in Cytoscape<sup>46</sup>.  
286 Colour intensity displays the fold change value (red; up-regulated genes and blue; down-regulated  
287 genes), edges are show in light grey; beside node size represents the degree centrality as  
288 interconnection.

289 **Figure 4. Functional enrichment analyses and transcriptional hallmarks of the proximal and**  
290 **distal airways from lung transplant (LTx) recipients.** (A) Scatter plot represents the significant  
291 categories enriched in up- and down- regulated genes. Bar side row represents databases used (DB),  
292 adjusted P-value (False Discovery Rate, FDR) colours the significance and dot size the numbers of  
293 genes involved in each category. (B) Category-gene network associations of enriched terms. Up-  
294 regulated genes in red and down-regulated genes in blue. (C) Transcriptional hallmarks overview of  
295 the airways. Samples from the proximal airways were collected close to the trachea (1). This region is  
296 constantly exposed to abiotic (allergens, cigarettes) and biotic (virus, bacteria, fungi) factors (2). Two  
297 proinflammatory pathways (IL-17 signalling and RAGE receptor binding) associated with defence  
298 mechanisms were found activated in this region (3). Distal airways specimens were collected near the  
299 alveoli (4), where the gas-exchange occurs (5). In agreement, these samples demonstrated abundance  
300 of transcripts related to surfactant metabolism, which is crucial to lower the alveolar surface tension  
301 during expiration (6). Figure created with [BioRender.com](#).

## 302 **Supplementary Material**

- 303 1 **Supplementary Material S1.** Raw counts generated with HTSeq<sup>4</sup>, and obtained from an  
304 alignment using STAR<sup>3</sup> to the Ensembl human reference genome hg19/GRCh37.
- 305 2 **Supplementary Material S2.** Expression values used for cluster analysis and gene expression  
306 profiles.
- 307 3 **Supplementary Material S3.** List of 355 differentially expressed genes with a cut-off of FC >  
308 |1.5| and FDR of 5%.
- 309 4 **Supplementary Material S4.** Data mining of transcript factor families based on Lambert et  
310 al.,<sup>12</sup>.
- 311 5 **Supplementary Material S5.** Transcription factor enrichment analysis of the upstream  
312 regulators using ChEA3<sup>13</sup>.
- 313 6 **Supplementary Material S6.** Network analysis of differentially expressed genes generated by  
314 Cystoscope<sup>15</sup>. Statistics related to (A) nodes and (B) edges, as well as (C) the subnetwork built  
315 in Figure 3C.
- 316 7 **Supplementary Material S7.** Enrichment analysis of differentially expressed genes using  
317 ClusterProfiler<sup>17</sup>.

## 318 **References**

- 319 1 Beeckmans H, Bos S, Vos R, Glanville AR. Acute Rejection and Chronic Lung Allograft  
320 Dysfunction: Obstructive and Restrictive Allograft Dysfunction. *Clin Chest Med* 2023; **44**:

- 321 137–157.
- 322 2 Swatek AM, Lynch TJ, Crooke AK, Anderson PJ, Tyler SR, Brooks L *et al.* Depletion of  
323 Airway Submucosal Glands and TP63 + KRT5 + Basal Cells in Obliterative Bronchiolitis. *Am*  
324 *J Respir Crit Care Med* 2018; **197**: 1045–1057.
- 325 3 Aguilar PR, Michelson AP, Isakow W. Obliterative Bronchiolitis. *Transplantation* 2016; **100**:  
326 272–283.
- 327 4 Banerjee B, Kicic A, Musk M, Sutanto EN, Stick SM, Chambers DC. Successful  
328 establishment of primary small airway cell cultures in human lung transplantation. *Respir Res*  
329 2009; **10**. doi:10.1186/1465-9921-10-99.
- 330 5 Bolger AM, Lohse M, Usadel B. Trimmomatic: A flexible trimmer for Illumina sequence data.  
331 *Bioinformatics* 2014; **30**: 2114–2120.
- 332 6 Dobin A, Davis CA, Schlesinger F, Drenkow J, Zaleski C, Jha S *et al.* STAR: Ultrafast  
333 universal RNA-seq aligner. *Bioinformatics* 2013; **29**: 15–21.
- 334 7 Anders S, Pyl PT, Huber W. HTSeq-A Python framework to work with high-throughput  
335 sequencing data. *Bioinformatics* 2015; **31**: 166–169.
- 336 8 Ewels P, Magnusson M, Lundin S, Källér M. MultiQC: Summarize analysis results for  
337 multiple tools and samples in a single report. *Bioinformatics* 2016; **32**: 3047–3048.
- 338 9 Robinson MD, McCarthy DJ, Smyth GK. edgeR: A Bioconductor package for differential  
339 expression analysis of digital gene expression data. *Bioinformatics* 2009; **26**: 139–140.
- 340 10 Ritchie ME, Phipson B, Wu D, Hu Y, Law CW, Shi W *et al.* Limma powers differential  
341 expression analyses for RNA-sequencing and microarray studies. *Nucleic Acids Res* 2015; **43**:  
342 e47.
- 343 11 Suzuki R, Shimodaira H. Pvcust: An R package for assessing the uncertainty in hierarchical  
344 clustering. *Bioinformatics* 2006; **22**: 1540–1542.
- 345 12 Benjamini Y, Hochberg Y. Controlling the False Discovery Rate: A Practical and Powerful  
346 Approach to Multiple Testing. 1995.
- 347 13 Carlson M. org.Hs.eg.db: Genome wide annotation for Human. 2019.
- 348 14 Blighe K, Rana S LM. EnhancedVolcano: Publication-ready volcano plots with enhanced  
349 colouring and labeling. 2020.
- 350 15 Lambert SA, Jolma A, Campitelli LF, Das PK, Yin Y, Albu M *et al.* The Human Transcription  
351 Factors. *Cell*. 2018; **172**: 650–665.
- 352 16 Keenan AB, Torre D, Lachmann A, Leong AK, Wojciechowicz ML, Utti V *et al.* ChEA3:  
353 transcription factor enrichment analysis by orthogonal omics integration. *Nucleic Acids Res*  
354 2019; **47**: W212–W224.
- 355 17 Zhou G, Soufan O, Ewald J, Hancock REW, Basu N, Xia J. NetworkAnalyst 3.0: A visual  
356 analytics platform for comprehensive gene expression profiling and meta-analysis. *Nucleic*  
357 *Acids Res* 2019; **47**: W234–W241.
- 358 18 Yu G, Wang LG, Han Y, He QY. ClusterProfiler: An R package for comparing biological  
359 themes among gene clusters. *Omi A J Integr Biol* 2012; **16**: 284–287.
- 360 19 Warburton D, Schwarz M, Tefft D, Flores-Delgado G, Anderson KD, Cardoso W V. The  
361 molecular basis of lung morphogenesis. *Mech. Dev.* 2000; **92**: 55–81.



- 362 20 Han BY, Foo CS, Wu S, Cyster JG. The C2H2-ZF transcription factor Zfp335 recognizes two  
363 consensus motifs using separate zinc finger arrays. *Genes Dev* 2016; **30**: 1509–1514.
- 364 21 Finnegan A, Cho RJ, Luu A, Harirchian P, Lee J, Cheng JB *et al.* Single-cell transcriptomics  
365 reveals spatial and temporal turnover of keratinocyte differentiation regulators. *Front Genet*  
366 2019; **10**: 775.
- 367 22 Bellefroid EJ, Leclère L, Saulnier A, Keruzore M, Sirakov M, Vervoort M *et al.* Expanding  
368 roles for the evolutionarily conserved Dmrt sex transcriptional regulators during  
369 embryogenesis. *Cell. Mol. Life Sci.* 2013; **70**: 3829–3845.
- 370 23 Whitsett JA, Kalin T V., Xu Y, Kalinichenko V V. Building and regenerating the lung cell by  
371 cell. *Physiol Rev* 2019; **99**: 513–554.
- 372 24 Lüdtke TH, Rudat C, Wojahn I, Weiss AC, Kleppa MJ, Kurz J *et al.* Tbx2 and Tbx3 Act  
373 Downstream of Shh to Maintain Canonical Wnt Signaling during Branching Morphogenesis of  
374 the Murine Lung. *Dev Cell* 2016; **39**: 239–253.
- 375 25 Levesque BM, Zhou S, Shan L, Johnston P, Kong Y, Degan S *et al.* NPAS1 regulates  
376 branching morphogenesis in embryonic lung. *Am J Respir Cell Mol Biol* 2007; **36**: 427–434.
- 377 26 Du Y, Guo M, Whitsett JA, Xu Y. ‘LungGENS’: A web-based tool for mapping single-cell  
378 gene expression in the developing lung. *Thorax* 2015; **70**: 1092–1094.
- 379 27 McCulley D, Wienhold M, Sun X. The pulmonary mesenchyme directs lung development.  
380 *Curr. Opin. Genet. Dev.* 2015; **32**: 98–105.
- 381 28 Kicic A, de Jong E, Ling KM, Nichol K, Anderson D, Wark PAB *et al.* Assessing the unified  
382 airway hypothesis in children via transcriptional profiling of the airway epithelium. *J Allergy*  
383 *Clin Immunol* 2020; **145**: 1562–1573.
- 384 29 Kim E, Jiang M, Huang H, Zhang Y, Tjota N, Gao X *et al.* Isl1 Regulation of Nkx2.1 in the  
385 Early Foregut Epithelium Is Required for Trachea-Esophageal Separation and Lung Lobation.  
386 *Dev Cell* 2019; **51**: 675-683.e4.
- 387 30 Vorotnikov A V., Tyurin-Kuzmin PA. Chemotactic signaling in mesenchymal cells compared  
388 to amoeboid cells. *Genes Dis.* 2014; **1**: 162–173.
- 389 31 Sutherland D, Samakovlis C, Krasnow MA. branchless encodes a Drosophila FGF homolog  
390 that controls tracheal cell migration and the pattern of branching. *Cell* 1996; **87**: 1091–1101.
- 391 32 Parks WC, Wilson CL, López-Boado YS. Matrix metalloproteinases as modulators of  
392 inflammation and innate immunity. *Nat Rev Immunol* 2004 48 2004; **4**: 617–629.
- 393 33 Uchinami H, Seki E, Brenner DA, Armiento JD’. Loss of MMP 13 Attenuates Murine Hepatic  
394 Injury and Fibrosis During Cholestasis. *Hepatology* 2006; **44**: 420–429.
- 395 34 Benyon JS, Duffield JPI, Kendall CM, Constandinou R, Christopher JA, Fallowfield M *et al.*  
396 Resolution of Murine Hepatic Fibrosis Metalloproteinase-13 and Facilitate the Source of  
397 Hepatic Matrix Scar-Associated Macrophages Are a Major. *J Immunol Ref* 2022; **178**: 5288–  
398 5295.
- 399 35 Nkyimbeng T, Ruppert C, Shiomi T, Dahal B, Lang G, Seeger W *et al.* Pivotal role of matrix  
400 metalloproteinase 13 in extracellular matrix turnover in idiopathic pulmonary fibrosis. *PLoS*  
401 *One* 2013; **8**. doi:10.1371/JOURNAL.PONE.0073279.
- 402 36 Uhlén M, Fagerberg L, Hallström BM, Lindskog C, Oksvold P, Mardinoglu A *et al.* Tissue-  
403 based map of the human proteome. *Science (80- )* 2015; **347**. doi:10.1126/science.1260419.

- 404 37 Kozlyuk N, Monteith AJ, Garcia V, Damo SM, Skaar EP, Chazin WJ. S100 Proteins in the  
405 Innate Immune Response to Pathogens. *Methods Mol Biol* 2019; **1929**: 275–290.
- 406 38 Gläser R, Harder J, Lange H, Bartels J, Christophers E, Schröder JM. Antimicrobial psoriasin  
407 (S100A7) protects human skin from *Escherichia coli* infection. *Nat Immunol* 2005; **6**: 57–64.
- 408 39 Corbin BD, Seeley EH, Raab A, Feldmann J, Miller MR, Torres VJ *et al.* Metal chelation and  
409 inhibition of bacterial growth in tissue abscesses. *Science (80- )* 2008; **319**: 962–965.
- 410 40 Lajoie S, Lewkowich IP, Suzuki Y, Clark JR, Sproles AA, Dienger K *et al.* Complement-  
411 mediated regulation of the IL-17A axis is a central genetic determinant of the severity of  
412 experimental allergic asthma. *Nat Immunol* 2010; **11**: 928–935.
- 413 41 Iwakura Y, Nakae S, Saijo S, Ishigame H. The roles of IL-17A in inflammatory immune  
414 responses and host defense against pathogens. *Immunol Rev* 2008; **226**: 57–79.
- 415 42 Bernardo ME, Fibbe WE. Mesenchymal stromal cells: Sensors and switchers of inflammation.  
416 *Cell Stem Cell*. 2013; **13**: 392–402.
- 417 43 Olmeda B, Martínez-Calle M, Pérez-Gil J. Pulmonary surfactant metabolism in the alveolar  
418 airspace: Biogenesis, extracellular conversions, recycling. *Ann Anat* 2017; **209**: 78–92.
- 419 44 Zuo WL, Rostami MR, Shenoy SA, Leblanc MG, Salit J, Strulovici-Barel Y *et al.* Cell-  
420 specific expression of lung disease risk-related genes in the human small airway epithelium.  
421 *Respir Res* 2020; **21**: 1–11.
- 422 45 Martinovich KM, Iosifidis T, Buckley AG, Looi K, Ling KM, Sutanto EN *et al.* Conditionally  
423 reprogrammed primary airway epithelial cells maintain morphology, lineage and disease  
424 specific functional characteristics. *Sci Rep* 2017; **7**: 17971.
- 425 46 Otasek D, Morris JH, Bouças J, Pico AR, Demchak B. Cytoscape Automation: empowering  
426 workflow-based network analysis. *Genome Biol* 2019; **20**: 185.
- 427



**(A)**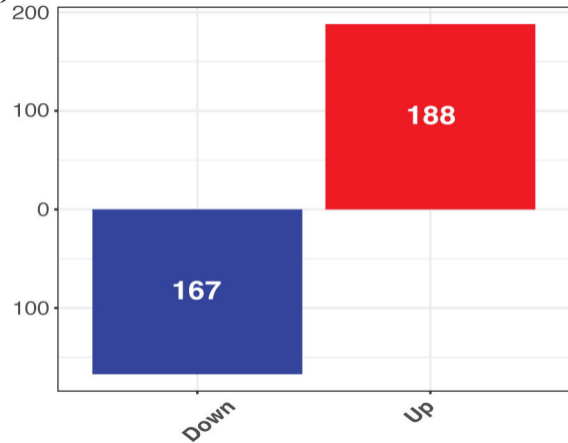**(B)**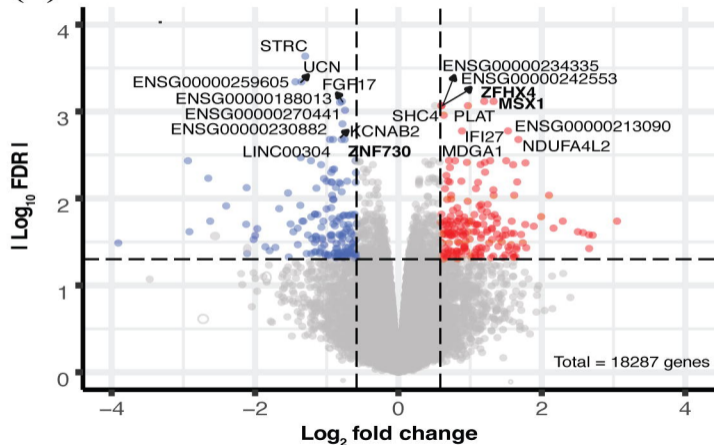

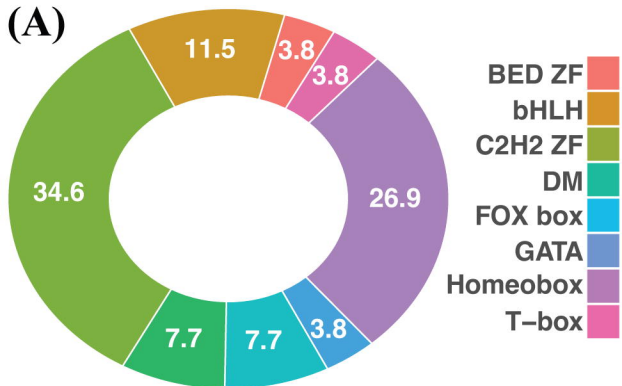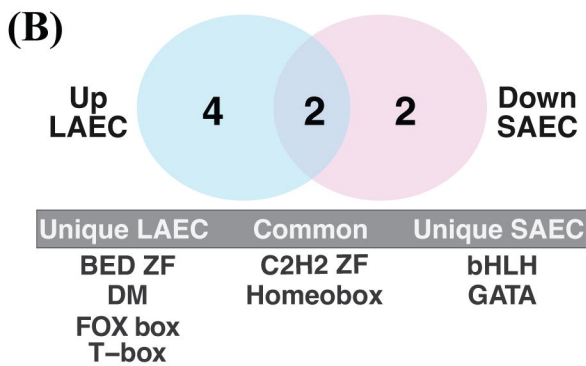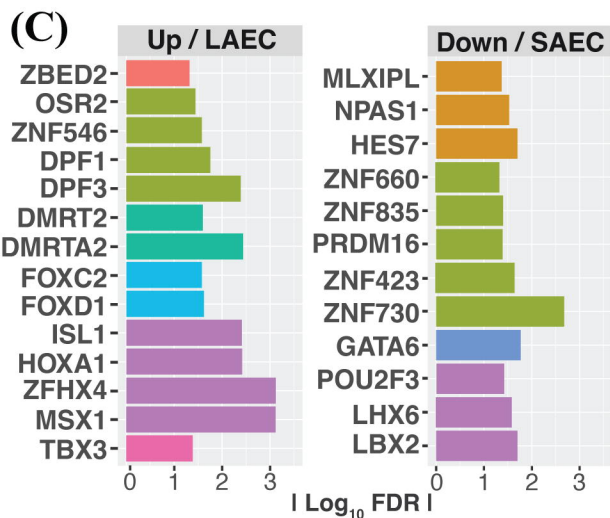

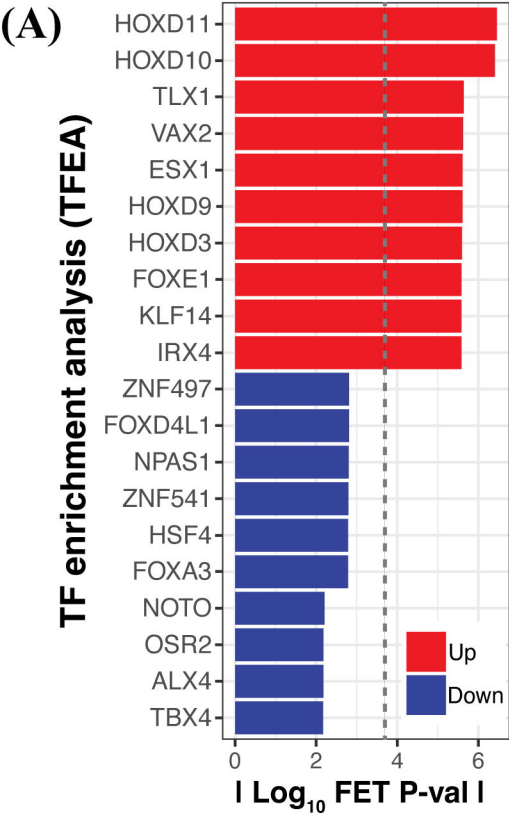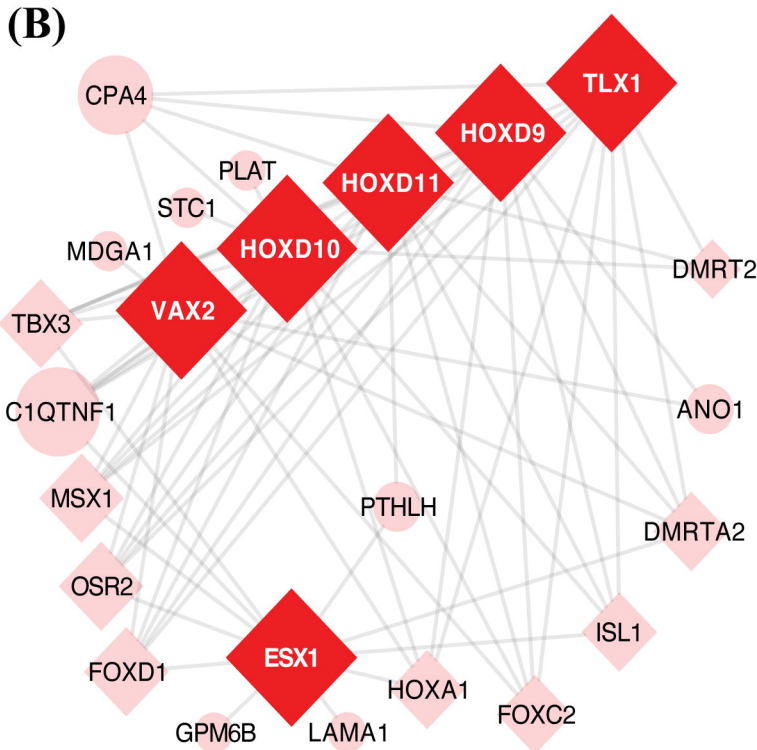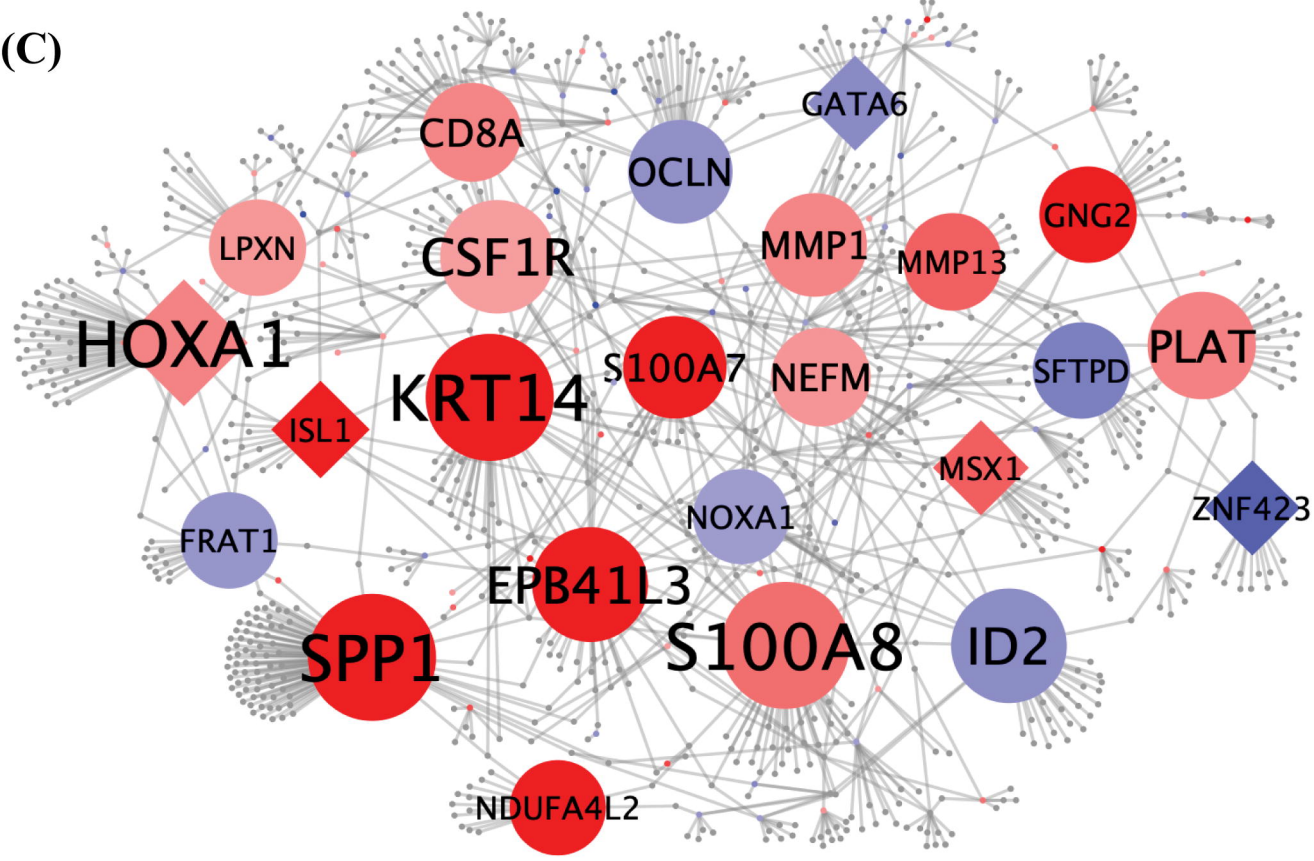

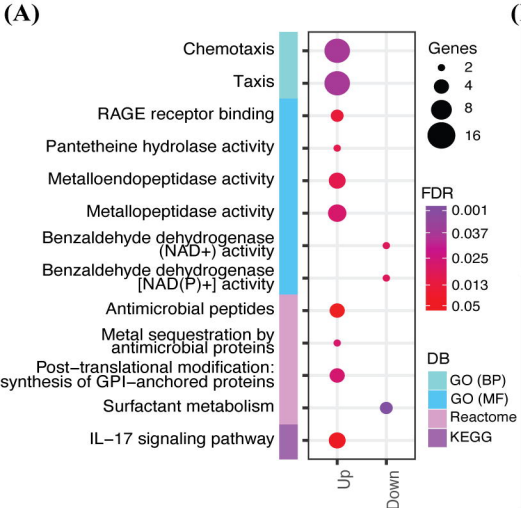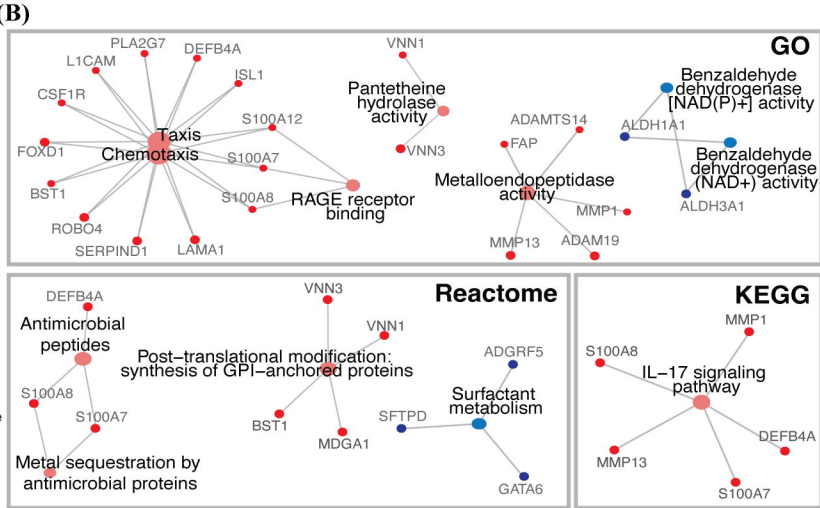

**(C)**

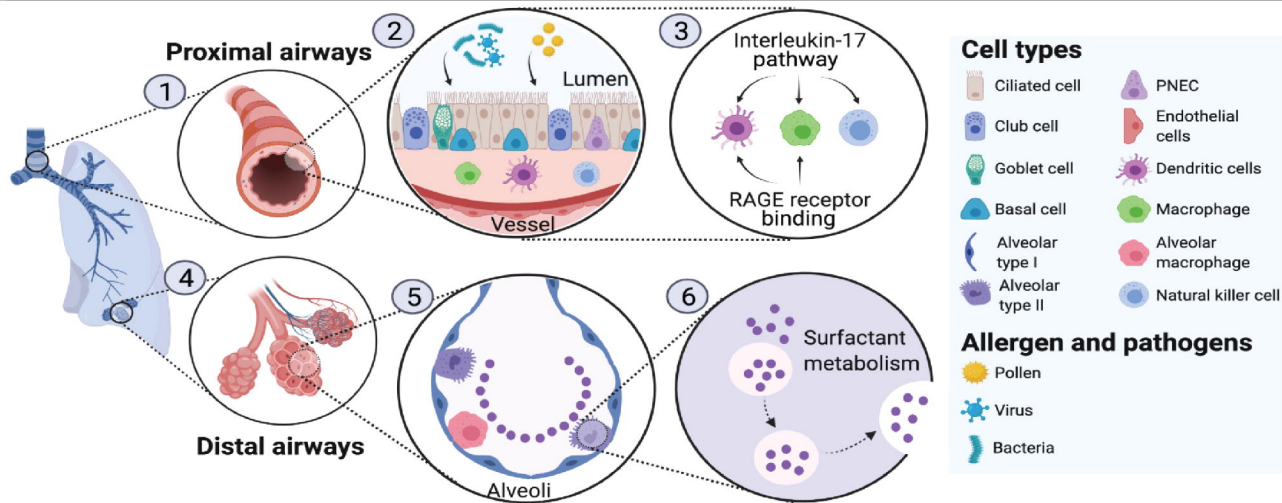

Source: https://medrxiv.org/content/10.1101/2023.04.03.23288063v1.full.pdf
